# Supplementary material
Source: PubMed Central journal article supplement (PMC3595543)
Supplement: NIHMS424728-supplement-01.pdf [file NIHMS424728-supplement-01.pdf]

**Table S1.** Michaelis-Menten parameters for target cleavage by *Drosophila* Ago2-RISC (mean  $\pm$  S.D.;  $n \geq 3$  except  $n = 2$  for mismatch positions marked with an asterisk).

| <i>let-7</i> -programmed Ago2-RISC |                   |                                |                            |                                |                                                         |                                                                                               |                                                         |
|------------------------------------|-------------------|--------------------------------|----------------------------|--------------------------------|---------------------------------------------------------|-----------------------------------------------------------------------------------------------|---------------------------------------------------------|
| Mismatch position                  | Mismatched target |                                | Fully complementary target |                                | $\frac{\text{relative } k_{cat}}{\text{relative } K_M}$ | Single-turnover<br>relative $v_0$ ,<br>$\frac{\text{mismatched}}{\text{fully complementary}}$ | $\frac{\text{relative } k_{cat}}{\text{relative } v_0}$ |
|                                    | $K_M$ (nM)        | $V_{max}$ (nMs <sup>-1</sup> ) | $K_M$ (nM)                 | $V_{max}$ (nMs <sup>-1</sup> ) |                                                         |                                                                                               |                                                         |
| g1 (C:A)                           | 17 $\pm$ 8        | 0.22 $\pm$ 0.09                | 17 $\pm$ 5                 | 0.23 $\pm$ 0.08                | 0.99 $\pm$ 0.34                                         | NA                                                                                            | NA                                                      |
| g1-g2 (CU:AC)                      | 42 $\pm$ 5        | 0.80 $\pm$ 0.10                | 26 $\pm$ 12                | 0.63 $\pm$ 0.20                | 0.72 $\pm$ 0.37                                         | NA                                                                                            | NA                                                      |
| g2-g3 (UC:CU)                      | 250 $\pm$ 10      | 0.48 $\pm$ 0.12                | 23 $\pm$ 10                | 0.24 $\pm$ 0.05                | 0.17 $\pm$ 0.08                                         | NA                                                                                            | NA                                                      |
| g3-g4 (UC:UC)                      | 320 $\pm$ 40      | 0.35 $\pm$ 0.24                | 31 $\pm$ 8                 | 0.21 $\pm$ 0.14                | 0.15 $\pm$ 0.06                                         | NA                                                                                            | NA                                                      |
| g4-g5 (UC:CC)                      | 2400 $\pm$ 300    | 0.63 $\pm$ 0.15                | 32 $\pm$ 11                | 0.23 $\pm$ 0.04                | 0.035 $\pm$ 0.015                                       | NA                                                                                            | NA                                                      |
| g5-g6 (UC:CA)                      | 1100 $\pm$ 100    | 0.27 $\pm$ 0.02                | 51 $\pm$ 20                | 0.28 $\pm$ 0.02                | 0.041 $\pm$ 0.012                                       | NA                                                                                            | NA                                                      |
| g6-g7 (CU:AU)                      | 390 $\pm$ 70      | 0.55 $\pm$ 0.03                | 15 $\pm$ 3                 | 0.18 $\pm$ 0.03                | 0.11 $\pm$ 0.03                                         | NA                                                                                            | NA                                                      |
| g7-g8 (UC:UC)                      | 88 $\pm$ 60       | 0.023 $\pm$ 0.008              | 24 $\pm$ 8                 | 0.27 $\pm$ 0.08                | 0.024 $\pm$ 0.009                                       | 0.0035 $\pm$ 0.0011                                                                           | 23 $\pm$ 7                                              |
| g8 (U:C)                           | 74 $\pm$ 15       | 0.43 $\pm$ 0.10                | 49 $\pm$ 1                 | 0.47 $\pm$ 0.05                | 0.59 $\pm$ 0.14                                         | 0.61 $\pm$ 0.06                                                                               | 1.5 $\pm$ 0.3                                           |
| g9 (C:A)                           | 30 $\pm$ 10       | 0.15 $\pm$ 0.04                | 16 $\pm$ 5                 | 0.079 $\pm$ 0.016              | 0.84 $\pm$ 0.64                                         | 0.80 $\pm$ 0.01                                                                               | 2.4 $\pm$ 0.7                                           |
| g8-g9 (UC:CA)                      | 6.0 $\pm$ 1.6     | 0.0018 $\pm$<br>0.0006         | 15 $\pm$ 2                 | 0.23 $\pm$ 0.03                | 0.025 $\pm$ 0.015                                       | 0.0052 $\pm$ 0.0017                                                                           | 2.1 $\pm$ 1.3                                           |
| g9-g10 (CU:AU)                     | 17 $\pm$ 6        | 0.021 $\pm$ 0.005              | 20 $\pm$ 7                 | 0.11 $\pm$ 0.04                | 0.23 $\pm$ 0.08                                         | 0.052 $\pm$ 0.008                                                                             | 3.8 $\pm$ 1.1                                           |
| g10-g11 (UC:UC)                    | 8.3 $\pm$ 1.2     | 0.0069 $\pm$<br>0.0003         | 8 $\pm$ 1                  | 0.11 $\pm$ 0.00                | 0.062 $\pm$ 0.005                                       | 0.016 $\pm$ 0.001                                                                             | 4.0 $\pm$ 0.4                                           |
| g12-g13 (UC:CA)                    | 34 $\pm$ 18       | 0.017 $\pm$ 0.007              | 20 $\pm$ 4                 | 0.28 $\pm$ 0.06                | 0.037 $\pm$ 0.014                                       | 0.0068 $\pm$ 0.0013                                                                           | 9.2 $\pm$ 2.6                                           |
| g13-g14 (CC:AA)                    | 68 $\pm$ 23       | 0.23 $\pm$ 0.05                | 19 $\pm$ 3                 | 0.14 $\pm$ 0.02                | 0.47 $\pm$ 0.16                                         | 0.25 $\pm$ 0.02                                                                               | 6.9 $\pm$ 1.0                                           |
| g15 (U:C)                          | 12 $\pm$ 4        | 0.11 $\pm$ 0.02                | 7 $\pm$ 1                  | 0.17 $\pm$ 0.03                | 0.36 $\pm$ 0.09                                         | NA                                                                                            | NA                                                      |
| g16 (G:G)*                         | 13 $\pm$ 7        | 0.24 $\pm$ 0.06                | 4.3 $\pm$ 1.6              | 0.15 $\pm$ 0.03                | 0.60 $\pm$ 0.11                                         | NA                                                                                            | NA                                                      |
| g16 (G:A)*                         | 14 $\pm$ 1        | 0.21 $\pm$ 0.01                | 4.3 $\pm$ 1.6              | 0.15 $\pm$ 0.03                | 0.38 $\pm$ 0.16                                         | NA                                                                                            | NA                                                      |
| g16 (C:A)                          | 7.0 $\pm$ 2.8     | 0.15 $\pm$ 0.01                | 3.4 $\pm$ 1.7              | 0.12 $\pm$ 0.02                | 0.54 $\pm$ 0.12                                         | NA                                                                                            | NA                                                      |
| g14-g15 (CU:AC)                    | 36 $\pm$ 10       | 0.018 $\pm$ 0.002              | 10 $\pm$ 6                 | 0.10 $\pm$ 0.01                | 0.042 $\pm$ 0.020                                       | 0.0071 $\pm$ 0.0011                                                                           | 25 $\pm$ 4                                              |
| g15-g16 (UC:CA)                    | 20 $\pm$ 9        | 0.011 $\pm$ 0.004              | 6.7 $\pm$ 6.1              | 0.11 $\pm$ 0.04                | 0.027 $\pm$ 0.016                                       | 0.0045 $\pm$ 0.0010                                                                           | 24 $\pm$ 9                                              |

|                          |         |               |           |             |               |               |           |
|--------------------------|---------|---------------|-----------|-------------|---------------|---------------|-----------|
| g15-g16 (AG:CA)          | 20 ± 14 | 0.064 ± 0.024 | 5.4 ± 1.2 | 0.17 ± 0.02 | 0.11 ± 0.07   | 0.033 ± 0.000 | 12 ± 5    |
| g17 (U:U)                | 23 ± 4  | 0.25 ± 0.08   | 12 ± 4    | 0.19 ± 0.06 | 0.67 ± 0.32   | NA            | NA        |
| g16-g17 (CU:AU)          | 22 ± 10 | 0.049 ± 0.006 | 6.9 ± 5.1 | 0.15 ± 0.01 | 0.086 ± 0.030 | 0.031 ± 0.001 | 10 ± 2    |
| g17-g18 (UC:UA)          | 19 ± 8  | 0.053 ± 0.019 | 12 ± 6    | 0.11 ± 0.03 | 0.27 ± 0.06   | 0.037 ± 0.007 | 12 ± 3    |
| g18-g19 (CU:AU)          | 33 ± 16 | 0.17 ± 0.03   | 22 ± 12   | 0.21 ± 0.05 | 0.45 ± 0.40   | NA            | NA        |
| g19-g20 (UC:UC)          | 19 ± 9  | 0.45 ± 0.26   | 13 ± 8    | 0.35 ± 0.20 | 0.79 ± 0.32   | 0.73 ± 0.03   | 1.8 ± 0.2 |
| g20-g21 (UC:CA)          | 29 ± 1  | 0.52 ± 0.03   | 16 ± 3    | 0.33 ± 0.05 | 0.82 ± 0.22   | NA            | NA        |
| g17-g21<br>(UCUCC:UAUCA) | 15 ± 7  | 0.053 ± 0.016 | 11 ± 5    | 0.10 ± 0.03 | 0.34 ± 0.19   | NA            | NA        |
| Parental <i>let-7</i>    | NA      | NA            | 25 ± 6    | 0.19 ± 0.04 | NA            | NA            | NA        |

| <i>Renilla reniformis</i> luciferase siRNA-programmed Ago2-RISC |            |               |         |             |               |                 |           |
|-----------------------------------------------------------------|------------|---------------|---------|-------------|---------------|-----------------|-----------|
| g4 (G:A)                                                        | 1700 ± 800 | 0.27 ± 0.11   | 55 ± 20 | 0.39 ± 0.08 | 0.021 ± 0.019 | 0.021 ± 0.007   | 30 ± 21   |
| g8g9 (UA:CG)                                                    | 31 ± 15    | 0.068 ± 0.029 | 55 ± 20 | 0.39 ± 0.08 | 0.31 ± 0.38   | 0.023 ± 0.015   | 6.8 ± 6.9 |
| g15g16 (AU:GC)                                                  | 660 ± 430  | 0.058 ± 0.023 | 55 ± 20 | 0.39 ± 0.08 | 0.011 ± 0.015 | 0.0021 ± 0.0013 | 62 ± 65   |

**Table S2A, related to Figure 1.** Synthetic siRNAs used in this study.

| <b>Description</b>                                                                                                      | <b>Sequence</b><br>(seed, guide, passenger, altered sequences) |
|-------------------------------------------------------------------------------------------------------------------------|----------------------------------------------------------------|
| <i>let-7</i> guide strand sequence. Completely complementary to perfect target                                          | pUGAGGUAGUAGGUUGUAUAGU                                         |
| Passenger strand to <i>let-7</i> guide and creates frayed siRNA with UU mismatch at g1 of preceding guide strand        | pUAUACAACCUACUACCUCCUU                                         |
| Passenger strand to <i>let-7</i> guide and creates frayed siRNA with UC mismatch at g1 of preceding guide strand        | pUAUACAACCUACUACCUUUU                                          |
| Modified <i>let-7</i> guide strand that creates 2 nt mismatches at g1g2:t1t2 when paired to <i>let-7</i> perfect target | pCUAGGUAGUAGGUUGUAUAGU                                         |
| Passenger strand to preceding guide                                                                                     | pUAUACAACCUACUACCUAUUU                                         |
| Modified <i>let-7</i> guide strand that creates 2 nt mismatches at g2g3:t2t3 when paired to <i>let-7</i> perfect target | pUUCGGUAGUAGGUUGUAUAGU                                         |
| Passenger strand to preceding guide                                                                                     | pUAUACAACCUACUACCGAUUU                                         |
| Modified <i>let-7</i> guide strand that creates 2 nt mismatches at g3g4:t3t4 when paired to <i>let-7</i> perfect target | pUGUCGUAGUAGGUUGUAUAGU                                         |
| Passenger strand to preceding guide                                                                                     | pUAUACAACCUACUACGACUUU                                         |
| Modified <i>let-7</i> guide strand that creates 2 nt mismatches at g4g5:t4t5 when paired to <i>let-7</i> perfect target | pUGAUCUAGUAGGUUGUAUAGU                                         |
| Passenger strand to preceding guide                                                                                     | pUAUACAACCUACUAGAUCUUU                                         |
| Modified <i>let-7</i> guide strand that creates 2 nt mismatches at g5g6:t5t6 when paired to <i>let-7</i> perfect target | pUGAGUCAGUAGGUUGUAUAGU                                         |
| Passenger strand to preceding guide                                                                                     | pUAUACAACCUACUGACUCUUU                                         |
| Modified <i>let-7</i> guide strand that creates 2 nt mismatches at g6g7:t6t7 when paired to <i>let-7</i> perfect target | pUGAGGCUGUAGGUUGUAUAGU                                         |
| Passenger strand to preceding guide                                                                                     | pUAUACAACCUACAGCCUCUUU                                         |
| Modified <i>let-7</i> guide strand that creates 2 nt mismatches at g7g8:t7t8 when paired to <i>let-7</i> perfect target | pUGAGGUUCUAGGUUGUAUAGU                                         |
| Passenger strand to preceding guide                                                                                     | pUAUACAACCUAGAACCUUUU                                          |

|                                                                                                                             |                         |
|-----------------------------------------------------------------------------------------------------------------------------|-------------------------|
| Modified <i>let-7</i> guide strand that creates 2 nt mismatches at g8g9:t8t9 when paired to <i>let-7</i> perfect target     | pUGAGGUAUCAGGUUGUAUAGU  |
| Passenger strand to preceding guide                                                                                         | pUAUACAACCCUGAUACCUCUUU |
| Modified <i>let-7</i> guide strand that creates 2 nt mismatches at g9g10:t9t10 when paired to <i>let-7</i> perfect target   | pUGAGGUAGCUGGUUGUAUAGU  |
| Passenger strand to preceding guide                                                                                         | pUAUACAACCAGCUACCUCUUU  |
| Modified <i>let-7</i> guide strand that creates 2 nt mismatches at g9g10:t9t10 when paired to <i>let-7</i> perfect target   | pUGAGGUAGGCGGUUGUAUAGU  |
| Passenger strand to preceding guide                                                                                         | pUAUACAACCGCCUACCUCUUU  |
| Modified <i>let-7</i> guide strand that creates 2 nt mismatches at g10g11:t10t11 when paired to <i>let-7</i> perfect target | pUGAGGUAGUUCGUUGUAUAGU  |
| Passenger strand to preceding guide                                                                                         | pUAUACAACGACUACCUCUUU   |
| Modified <i>let-7</i> guide strand that creates 2 nt mismatches at g10g11:t10t11 when paired to <i>let-7</i> perfect target | pUGAGGUAGUCAGUUGUAUAGU  |
| Passenger strand to preceding guide                                                                                         | pUAUACAACUGACUACCUCUUU  |
| Modified <i>let-7</i> guide strand that creates 2 nt mismatches at g11g12:t11t12 when paired to <i>let-7</i> perfect target | pUGAGGUAGUAAUUGUAUAGU   |
| Passenger strand to preceding guide                                                                                         | pUAUACAAUUUACUACCUCUUU  |
| Modified <i>let-7</i> guide strand that creates 2 nt mismatches at g11g12:t11t12 when paired to <i>let-7</i> perfect target | pUGAGGUAGUAUUUUGUAUAGU  |
| Passenger strand to preceding guide                                                                                         | pUAUACAAAUACUACCUCUUU   |
| Modified <i>let-7</i> guide strand that creates 2 nt mismatches at g11g12:t11t12 when paired to <i>let-7</i> perfect target | pUGAGGUAGUAUAUUGUAUAGU  |
| Passenger strand to preceding guide                                                                                         | pUAUACAAUAUACUACCUCUUU  |
| Modified <i>let-7</i> guide strand that creates 2 nt mismatches at g11g12:t11t12 when paired to <i>let-7</i> perfect target | pUGAGGUAGUAUCUUGUAUAGU  |
| Passenger strand to preceding guide                                                                                         | pUAUACAAGAUACUACCUCUUU  |

|                                                                                                                             |                          |
|-----------------------------------------------------------------------------------------------------------------------------|--------------------------|
| Modified <i>let-7</i> guide strand that creates 2 nt mismatches at g12g13:t12t13 when paired to <i>let-7</i> perfect target | pUGAGGUAGUAGUCUGUAUAGU   |
| Passenger strand to preceding guide                                                                                         | pUAUACAGACUACUACCUCUUU   |
| Modified <i>let-7</i> guide strand that creates 2 nt mismatches at g13g14:t13t14 when paired to <i>let-7</i> perfect target | pUGAGGUAGUAGGCCGUAUAGU   |
| Passenger strand to preceding guide                                                                                         | pUAUACGGCCUACUACCUCUUU   |
| Modified <i>let-7</i> guide strand that creates 2 nt mismatches at g14g15:t14t15 when paired to <i>let-7</i> perfect target | pUGAGGUAGUAGGUCUUAUAGU   |
| Passenger strand to preceding guide                                                                                         | pUAUAAGACCUACUACCUCUUU   |
| Modified <i>let-7</i> guide strand that creates 2 nt mismatches at g15g16:t15t16 when paired to <i>let-7</i> perfect target | pUGAGGUAGUAGGUUUCUAUAGU  |
| Passenger strand to preceding guide                                                                                         | pUAUGAAACCUACUACCUCUUU   |
| Modified <i>let-7</i> guide strand that creates 2 nt mismatches at g15g16:t15t16 when paired to <i>let-7</i> perfect target | pUGAGGUAGUAGGUUAGAUAUAGU |
| Passenger strand to preceding guide                                                                                         | pUAUCUAACCUACUACCUCUUU   |
| Modified <i>let-7</i> guide strand that creates 2 nt mismatches at g16g17:t16t17 when paired to <i>let-7</i> perfect target | pUGAGGUAGUAGGUUGCUUAGU   |
| Passenger strand to preceding guide                                                                                         | pUAAGCAACCUACUACCUCUUU   |
| Modified <i>let-7</i> guide strand that creates 2 nt mismatches at g17g18:t17t18 when paired to <i>let-7</i> perfect target | pUGAGGUAGUAGGUUGUUCAGU   |
| Passenger strand to preceding guide                                                                                         | pUGACAACCUACUACCUCUUU    |
| Modified <i>let-7</i> guide strand that creates 2 nt mismatches at g18g19:t18t19 when paired to <i>let-7</i> perfect target | pUGAGGUAGUAGGUUGUACUGU   |
| Passenger strand to preceding guide                                                                                         | pAGUACAACCUACUACCUCUUU   |
| Modified <i>let-7</i> guide strand that creates 2 nt mismatches at g19g20:t19t20 when paired to <i>let-7</i> perfect target | pUGAGGUAGUAGGUUGUAUUCU   |
| Passenger strand to preceding guide                                                                                         | pAAUACAACCUACUACCUCUUU   |

|                                                                                                                             |                         |
|-----------------------------------------------------------------------------------------------------------------------------|-------------------------|
| Modified <i>let-7</i> guide strand that creates 2 nt mismatches at g20g21:t20t21 when paired to <i>let-7</i> perfect target | pUGAGGUAGUAGGUUGUAUAUC  |
| Modified <i>let-7</i> guide strand that creates 1 nt mismatch at g1:t1 when paired to <i>let-7</i> perfect target           | pCGAGGUAGUAGGUUGUAUAGU  |
| Modified <i>let-7</i> guide strand that creates 1 nt mismatch at g14:t14 when paired to <i>let-7</i> perfect target         | pUGAGGUAGUAGGUUGUAUAGU  |
| Passenger strand to preceding guide                                                                                         | pUAUACGACCUACUACCUCUUU  |
| Modified <i>let-7</i> guide strand that creates 1 nt mismatch at g15:t15 when paired to <i>let-7</i> perfect target         | pUGAGGUAGUAGGUUUUAUAGU  |
| Passenger strand to preceding guide                                                                                         | pUAUAACAACCUACUACCUCUUU |
| Modified <i>let-7</i> guide strand that creates 1 nt mismatch at g15:t15 when paired to <i>let-7</i> perfect target         | pUGAGGUAGUAGGUUAUAUAGU  |
| Passenger strand to preceding guide                                                                                         | pUAUAUAACCUACUACCUCUUU  |
| Modified <i>let-7</i> guide strand that creates 1 nt mismatch at g16:t16 when paired to <i>let-7</i> perfect target         | pUGAGGUAGUAGGUUGGAUAGU  |
| Passenger strand to preceding guide                                                                                         | pUAUCCAACCUACUACCUCUUU  |
| Modified <i>let-7</i> guide strand that creates 1 nt mismatch at g16:t16 when paired to <i>let-7</i> perfect target         | pUGAGGUAGUAGGUUGCAUAGU  |
| Passenger strand to preceding guide                                                                                         | pUAUJCAACCUACUACCUCUUU  |
| Modified <i>let-7</i> guide strand that creates 1 nt mismatch at g17:t17 when paired to <i>let-7</i> perfect target         | pUGAGGUAGUAGGUUGUUAGU   |
| Passenger strand to preceding guide                                                                                         | pUAACAACCUACUACCUCUUU   |
| Modified <i>let-7</i> guide strand that creates 1 nt mismatch at g9:t9 when paired to <i>let-7</i> perfect target           | pUGAGGUAGCAGGUUGUAUAGU  |
| Passenger strand to preceding guide                                                                                         | pUAUACAACCUJGUACCUCUUU  |
| Modified <i>let-7</i> guide strand that creates 1 nt mismatch at g10:t10 when paired to <i>let-7</i> perfect target         | pUGAGGUAGUUGGUUGUAUAGU  |
| Passenger strand to preceding guide                                                                                         | pUAUACAACCAACUACCUCUUU  |

|                                                                                                                               |                        |
|-------------------------------------------------------------------------------------------------------------------------------|------------------------|
| Modified <i>let-7</i> guide strand that creates 1 nt mismatch at g11:t11 when paired to <i>let-7</i> perfect target           | pUGAGGUAGUAAGUUGUAUAGU |
| Passenger strand to preceding guide                                                                                           | pUAUACAACUACUACCUCUUU  |
| Modified <i>let-7</i> guide strand that creates 1 nt mismatch at g12:t12 when paired to <i>let-7</i> perfect target           | pUGAGGUAGUAGAUUGUAUAGU |
| Passenger strand to preceding guide                                                                                           | pUAUACAAUCUACUACCUCUUU |
| Modified <i>let-7</i> guide strand that creates 3 nt mismatches at g15–g17:t15–t17 when paired to <i>let-7</i> perfect target | pUGAGGUAGUAGGUUUCUAGU  |
| Passenger strand to preceding guide                                                                                           | pUAAGAAACCUACUACCUCUUU |
| Modified <i>let-7</i> guide strand that creates 4 nt mismatches at g14–g17:t14–t17 when paired to <i>let-7</i> target         | pUGAGGUAGUAGGUCUCUAGU  |
| Passenger strand to preceding guide                                                                                           | pUAAGAGACCUACUACCUCUUU |
| Modified <i>let-7</i> guide strand that creates 5 nt mismatches at g17–g21:t17–t21 when paired to <i>let-7</i> perfect target | pUGAGGUAGUAGGUUGUUCUCC |
| Passenger strand to preceding guide                                                                                           | pAGACAACCUACUACCUCUUU  |
| Modified <i>let-7</i> guide strand that creates 6 nt mismatches at g16–g21:t16–t21 when paired to <i>let-7</i> perfect target | pUGAGGUAGUAGGUUGCUCUCC |
| Passenger strand to preceding guide                                                                                           | pAGAGCAACCUACUACCUCUUU |
| Modified <i>let-7</i> guide strand that creates 7 nt mismatches at g15–g21:t15–t21 when paired to <i>let-7</i> perfect target | pUGAGGUAGUAGGUUUCUCUCC |
| Passenger strand to preceding guide                                                                                           | pAGAGAAACCUACUACCUCUUU |
| Modified <i>let-7</i> guide strand that creates 8 nt mismatches at g14–g21:t14–t21 when paired to <i>let-7</i> perfect target | pUGAGGUAGUAGGUCUCUCUCC |
| Passenger strand to preceding guide                                                                                           | pAGAGAGACCUACUACCUCUUU |
| Renilla reniformis luciferase derived siRNA guide strand                                                                      | pAUAGCUAUAUGAAAUGCCUU  |
| Passenger strand to preceding guide                                                                                           | pGGCAUUUCAUUUAGCUACUU  |

|                                                                                |                                          |
|--------------------------------------------------------------------------------|------------------------------------------|
| RNA that is exactly complementary to <i>let-7</i> guide used as Northern probe | pACU <u>AUACAACCU</u> AGU <u>ACCUC</u> A |
|--------------------------------------------------------------------------------|------------------------------------------|

| Description                      | Sequence            |
|----------------------------------|---------------------|
| 7 nt target strand for RNA melt  | pCU <u>ACCUC</u>    |
| 9 nt target strand for RNA melt  | pU <u>ACUACCUC</u>  |
| 10 nt target strand for RNA melt | pCU <u>ACUACCUC</u> |

| Description                                                                   | Sequence<br>(m, 2'-O-methyl ribose; ps; phosphorothioate; complementary to guide; mismatch) |
|-------------------------------------------------------------------------------|---------------------------------------------------------------------------------------------|
| Complete complementary target to <i>let-7</i>                                 | pGAU <u>ACU<u>AUACAAC</u>mCpsmU<u>ACUACCUC</u>AACCU</u>                                     |
| Complete complementary target to <i>let-7</i> (unmodified and cleavable)      | pGAU <u>ACU<u>AUACAACCU</u>ACU<u>ACCUC</u>AACCU</u>                                         |
| 21 nt complete complementary target to <i>let-7</i>                           | pACU <u>AUACAACmCpsmU<u>ACUACCUC</u>A</u>                                                   |
| Target complementary to <i>let-7</i> with g9–g11:t9–t11 central internal loop | pGAU <u>ACU<u>AUACAAC</u>AGUCU<u>ACCUC</u>AACCU</u>                                         |
| Target to <i>let-7</i> with g2–g21 complementarity                            | pGAU <u>ACU<u>AUACAACmCpsmU<u>ACUACCUC</u></u>UACCU</u>                                     |
| Target to <i>let-7</i> with g1–g19 complementarity                            | pGAU <u>U<u>AUACAACmCpsmU<u>ACUACCUC</u></u>AACCU</u>                                       |
| Target to <i>let-7</i> with g4g5:t4t5 seed internal loop                      | pGAU <u>ACU<u>AUACAACmCpsmU<u>ACU</u>AA<u>UCAACCU</u></u></u>                               |
| Target to <i>let-7</i> with g8g9:t8t9 central internal loop                   | pGAU <u>ACU<u>AUACAACmCpsmU<u>UAUACCUC</u></u>AACCU</u>                                     |



|                                                                                                     |                                                      |
|-----------------------------------------------------------------------------------------------------|------------------------------------------------------|
| Target to <i>let-7</i> with g10g11:t10t11 central internal loop                                     | pGAUACU <u>AUACAAC</u> mGpsmACU <u>ACCUCA</u> ACCU   |
| Target to <i>let-7</i> with g15g16:t15t16 3' supplementary region internal loop                     | pGAUACU <u>AUCGAA</u> CmCpsmUACU <u>ACCUCA</u> ACCU  |
| Target to <i>let-7</i> with g2–g16:t2–t16 complementarity                                           | pGAUUAGCC <u>ACAAC</u> CmCpsmUACU <u>ACCUCA</u> ACCU |
| Target to <i>let-7</i> with g9–g21:t9–t21 complementarity                                           | pGAUACU <u>AUACAAC</u> CmCpsmUAG <u>AUGGAG</u> AAAAU |
| Target to <i>let-7</i> with seed only pairing (g2–g8:t2–t8)                                         | pGAAAA <u>AAAAAAAA</u> mApsmAU <u>CUACCUCU</u> AAAAU |
| Target to <i>let-7</i> with seed + 3' supplementary pairing (g2–g8:t2–t8; g13–g16:t13–t16)          | pGAAAA <u>AAACAAA</u> mApsmAU <u>CUACCUCU</u> AAAAU  |
| Target to <i>let-7</i> with extended seed pairing (g2–g10:t2–t10)                                   | pGAAAA <u>AAAAUU</u> A mApsmU <u>ACUACCUCU</u> AAAAU |
| Target to <i>let-7</i> with seed + extended 3' supplementary pairing (g2–g8:t2–t8; g12–g17:t12–t17) | pGAAAA <u>UUACAAC</u> CmApsmAU <u>CUACCUCU</u> AAAAU |
| Target to <i>let-7</i> with centered pairing (g4–g15:t4–t15)                                        | pGAU <u>GGAAACCA</u> CmCpsmU <u>ACUACCAGU</u> ACCU   |
| Perfect target to <i>Renilla reniformis</i> luciferase                                              | pGAUAAGGCA <u>UUUC</u> mApsmU <u>UAUAGCU</u> AUACCU  |
| Target to <i>let-7</i> with 1 GU wobble in the seed at g4                                           | pGAUACU <u>AUACAAC</u> CmCpsmUACU <u>ACUUCA</u> ACCU |
| Target to <i>let-7</i> with 1 GU wobble in the 3' supplementary region at g15                       | pGAUACU <u>AUUAAC</u> CmCpsmUACU <u>ACCUCA</u> ACCU  |
| Target to <i>let-7</i> with 2 GU wobble in the seed at g2 and g8                                    | pGAUACU <u>AUACAAC</u> CmCpsmU <u>AUUACCU</u> UAACCU |
| Target to <i>let-7</i> with 2 GU wobble in the seed at g4 and g5                                    | pGAUACU <u>AUACAAC</u> CmCpsmUACU <u>AUUUCA</u> ACCU |
| Target to <i>let-7</i> with 4 GU wobble in the seed at g2, g4, g5 and g8                            | pGAUACU <u>AUACAAC</u> CmCpsmU <u>AUUUUUA</u> ACCU   |

**Table S2B, related to Figure 1.** DNA oligonucleotides used in this study.

| <b>Description</b>                                                                                                                                                              | <b>Sequence</b><br>(siRNA pairing site,<br>change from <i>let-7</i> complementary target)                                                            |
|---------------------------------------------------------------------------------------------------------------------------------------------------------------------------------|------------------------------------------------------------------------------------------------------------------------------------------------------|
| Forward primer containing <b>T7 promoter consensus sequence</b> for making DNA template used in transcription of <i>let-7</i> based targets.                                    | <b>GCG TAA TAC GAC TCA CTA TAG GGT CAC ATC TCA TCT ACC TCC</b>                                                                                       |
| Reverse primer for making <i>let-7</i> guide perfect target                                                                                                                     | CCC ATT TAG GTG ACA CTA TAG ATT TAC ATC GCG TTG AGT GTA GAA CGG TTG TAT AAA AGG <b>TTG AGG TAG TAG GTT GTA TAG TAT CCA GAG GAA TTC ATT ATC AGT G</b> |
| Reverse primer for making <i>let-7</i> passenger strand perfect target                                                                                                          | CCC ATT TAG GTG ACA CTA TAG ATT TAC ATC GCG TTG AGT GTA GAA CGG TTG TAT AAA AGG <b>TTA TAC AAC CTA CTA CCT CTT TAT CCA GAG GAA TTC ATT ATC AGT G</b> |
| Reverse primer for making <b>compensatory target</b> to modified <i>let-7</i> guide strand that creates 2 nt mismatches at g1g2:t1t2 when paired to <i>let-7</i> perfect target | CCC ATT TAG GTG ACA CTA TAG ATT TAC ATC GCG TTG AGT GTA GAA CGG TTG TAT AAA AGG <b>TCT AGG TAG TAG GTT GTA TAG TAT CCA GAG GAA TTC ATT ATC AGT G</b> |
| Reverse primer for making <b>compensatory target</b> to modified <i>let-7</i> guide strand that creates 2 nt mismatches at g2g3:t2t3 when paired to <i>let-7</i> perfect target | CCC ATT TAG GTG ACA CTA TAG ATT TAC ATC GCG TTG AGT GTA GAA CGG TTG TAT AAA AGG <b>TTT CGG TAG TAG GTT GTA TAG TAT CCA GAG GAA TTC ATT ATC AGT G</b> |
| Reverse primer for making <b>compensatory target</b> to modified <i>let-7</i> guide strand that creates 2 nt mismatches at g3g4:t3t4 when paired to <i>let-7</i> perfect target | CCC ATT TAG GTG ACA CTA TAG ATT TAC ATC GCG TTG AGT GTA GAA CGG TTG TAT AAA AGG <b>TTG TCG TAG TAG GTT GTA TAG TAT CCA GAG GAA TTC ATT ATC AGT G</b> |
| Reverse primer for making <b>compensatory target</b> to modified <i>let-7</i> guide strand that creates 2 nt mismatches at g4g5:t4t5 when paired to <i>let-7</i> perfect target | CCC ATT TAG GTG ACA CTA TAG ATT TAC ATC GCG TTG AGT GTA GAA CGG TTG TAT AAA AGG <b>TTG ATC TAG TAG GTT GTA TAG TAT CCA GAG GAA TTC ATT ATC AGT G</b> |
| Reverse primer for making <b>compensatory target</b> to modified <i>let-7</i> guide strand that creates 2 nt mismatches at g5g6:t5t6 when paired to <i>let-7</i> perfect target | CCC ATT TAG GTG ACA CTA TAG ATT TAC ATC GCG TTG AGT GTA GAA CGG TTG TAT AAA AGG <b>TTG AGT CAG TAG GTT GTA TAG TAT CCA GAG GAA TTC ATT ATC AGT G</b> |

|                                                                                                                                                                                            |                                                                                                                                                               |
|--------------------------------------------------------------------------------------------------------------------------------------------------------------------------------------------|---------------------------------------------------------------------------------------------------------------------------------------------------------------|
| Reverse primer for making <b>compensatory target</b> to modified <i>let-7</i> guide strand that creates 2 nt mismatches at g6g7:t6t7 when paired to <i>let-7</i> perfect target            | CCC ATT TAG GTG ACA CTA TAG ATT TAC ATC<br>GCG TTG AGT GTA GAA CGG TTG TAT AAA AGG<br>TTG AGG <b>CTG TAG GTT GTA TAG TAT</b> CCA GAG<br>GAA TTC ATT ATC AGT G |
| Reverse primer for making <b>compensatory target</b> to modified <i>let-7</i> guide strand that creates 2 nt mismatches at g7g8:t7t8 when paired to <i>let-7</i> perfect target            | CCC ATT TAG GTG ACA CTA TAG ATT TAC ATC<br>GCG TTG AGT GTA GAA CGG TTG TAT AAA AGG<br>TTG AGG <b>TTC TAG GTT GTA TAG TAT</b> CCA GAG<br>GAA TTC ATT ATC AGT G |
| Reverse primer for making <b>compensatory target</b> to modified <i>let-7</i> guide strand that creates 2 nt mismatches at g8g9:t8t9 when paired to <i>let-7</i> perfect target            | CCC ATT TAG GTG ACA CTA TAG ATT TAC ATC<br>GCG TTG AGT GTA GAA CGG TTG TAT AAA AGG<br>TTG AGG <b>TAT CAG GTT GTA TAG TAT</b> CCA GAG<br>GAA TTC ATT ATC AGT G |
| Reverse primer for making first <b>compensatory target</b> to modified <i>let-7</i> guide strand that creates 2 nt mismatches at g9g10:t9t10 when paired to <i>let-7</i> perfect target    | CCC ATT TAG GTG ACA CTA TAG ATT TAC ATC<br>GCG TTG AGT GTA GAA CGG TTG TAT AAA AGG<br>TTG AGG <b>TAG CTG GTT GTA TAG TAT</b> CCA GAG<br>GAA TTC ATT ATC AGT G |
| Reverse primer for making second <b>compensatory target</b> to modified <i>let-7</i> guide strand that creates 2 nt mismatches at g9g10:t9t10 when paired to <i>let-7</i> perfect target   | CCC ATT TAG GTG ACA CTA TAG ATT TAC ATC<br>GCG TTG AGT GTA GAA CGG TTG TAT AAA AGG<br>TTG AGG <b>TAG GCG GTT GTA TAG TAT</b> CCA GAG<br>GAA TTC ATT ATC AGT G |
| Reverse primer for making first <b>compensatory target</b> to modified <i>let-7</i> guide strand that creates 2 nt mismatches at g10g11:t10t11 when paired to <i>let-7</i> perfect target  | CCC ATT TAG GTG ACA CTA TAG ATT TAC ATC<br>GCG TTG AGT GTA GAA CGG TTG TAT AAA AGG<br>TTG AGG <b>TAG TTC GTT GTA TAG TAT</b> CCA GAG<br>GAA TTC ATT ATC AGT G |
| Reverse primer for making second <b>compensatory target</b> to modified <i>let-7</i> guide strand that creates 2 nt mismatches at g10g11:t10t11 when paired to <i>let-7</i> perfect target | CCC ATT TAG GTG ACA CTA TAG ATT TAC ATC<br>GCG TTG AGT GTA GAA CGG TTG TAT AAA AGG<br>TTG AGG <b>TAG TCA GTT GTA TAG TAT</b> CCA GAG<br>GAA TTC ATT ATC AGT G |
| Reverse primer for making first <b>compensatory target</b> to modified <i>let-7</i> guide strand that creates 2 nt mismatches at g11g12:t11t12 when paired to <i>let-7</i> perfect target  | CCC ATT TAG GTG ACA CTA TAG ATT TAC ATC<br>GCG TTG AGT GTA GAA CGG TTG TAT AAA AGG<br>TTG AGG <b>TAG TAA ATT GTA TAG TAT</b> CCA GAG<br>GAA TTC ATT ATC AGT G |
| Reverse primer for second <b>complementary target</b> to p21- modified <i>let-7</i> guide strand that creates 2 nt mismatches at g11g12:t11t12 when paired to <i>let-7</i> perfect target  | CCC ATT TAG GTG ACA CTA TAG ATT TAC ATC<br>GCG TTG AGT GTA GAA CGG TTG TAT AAA AGG<br>TTG AGG <b>TAG TAT TTT GTA TAG TAT</b> CCA GAG<br>GAA TTC ATT ATC AGT G |
| Reverse primer for making third <b>compensatory target</b> to modified <i>let-7</i> guide strand that creates 2 nt mismatches at g11g12:t11t12 when paired to <i>let-7</i> perfect target  | CCC ATT TAG GTG ACA CTA TAG ATT TAC ATC<br>GCG TTG AGT GTA GAA CGG TTG TAT AAA AGG<br>TTG AGG <b>TAG TAT ATT GTA TAG TAT</b> CCA GAG<br>GAA TTC ATT ATC AGT G |

|                                                                                                                                                                                            |                                                                                                                                                               |
|--------------------------------------------------------------------------------------------------------------------------------------------------------------------------------------------|---------------------------------------------------------------------------------------------------------------------------------------------------------------|
| Reverse primer for making fourth <b>compensatory target</b> to modified <i>let-7</i> guide strand that creates 2 nt mismatches at g11g12:t11t12 when paired to <i>let-7</i> perfect target | CCC ATT TAG GTG ACA CTA TAG ATT TAC ATC<br>GCG TTG AGT GTA GAA CGG TTG TAT AAA AGG<br><b>TTG AGG TAG TAT CTT GTA TAG TAT</b> CCA GAG<br>GAA TTC ATT ATC AGT G |
| Reverse primer for making <b>compensatory target</b> to modified <i>let-7</i> guide strand that creates 2 nt mismatches at g12g13:t12t13 when paired to <i>let-7</i> perfect target        | CCC ATT TAG GTG ACA CTA TAG ATT TAC ATC<br>GCG TTG AGT GTA GAA CGG TTG TAT AAA AGG<br><b>TTG AGG TAG TAG TCT GTA TAG TAT</b> CCA GAG<br>GAA TTC ATT ATC AGT G |
| Reverse primer for making <b>compensatory target</b> to modified <i>let-7</i> guide strand that creates 2 nt mismatches at g13g14:t13t14 when paired to <i>let-7</i> perfect target        | CCC ATT TAG GTG ACA CTA TAG ATT TAC ATC<br>GCG TTG AGT GTA GAA CGG TTG TAT AAA AGG<br><b>TTG AGG TAG TAG GCC GTA TAG TAT</b> CCA GAG<br>GAA TTC ATT ATC AGT G |
| Reverse primer for making <b>compensatory target</b> to modified <i>let-7</i> guide strand that creates 2 nt mismatches at g14g15:t14t15 when paired to <i>let-7</i> perfect target        | CCC ATT TAG GTG ACA CTA TAG ATT TAC ATC<br>GCG TTG AGT GTA GAA CGG TTG TAT AAA AGG<br><b>TTG AGG TAG TAG GTC TTA TAG TAT</b> CCA GAG<br>GAA TTC ATT ATC AGT G |
| Reverse primer for making first <b>compensatory target</b> to modified <i>let-7</i> guide strand that creates 2 nt mismatches at g15g16:t15t16 when paired to <i>let-7</i> perfect target  | CCC ATT TAG GTG ACA CTA TAG ATT TAC ATC<br>GCG TTG AGT GTA GAA CGG TTG TAT AAA AGG<br><b>TTG AGG TAG TAG GTT TCA TAG TAT</b> CCA GAG<br>GAA TTC ATT ATC AGT G |
| Reverse primer for making second <b>compensatory target</b> to modified <i>let-7</i> guide strand that creates 2 nt mismatches at g15g16:t15t16 when paired to <i>let-7</i> perfect target | CCC ATT TAG GTG ACA CTA TAG ATT TAC ATC<br>GCG TTG AGT GTA GAA CGG TTG TAT AAA AGG<br><b>TTG AGG TAG TAG GTT AGA TAG TAT</b> CCA GAG<br>GAA TTC ATT ATC AGT G |
| Reverse primer for making <b>compensatory target</b> to modified <i>let-7</i> guide strand that creates 2 nt mismatches at g16g17:t16t17 when paired to <i>let-7</i> perfect target        | CCC ATT TAG GTG ACA CTA TAG ATT TAC ATC<br>GCG TTG AGT GTA GAA CGG TTG TAT AAA AGG<br><b>TTG AGG TAG TAG GTT GCT TAG TAT</b> CCA GAG<br>GAA TTC ATT ATC AGT G |
| Reverse primer for making <b>compensatory target</b> to modified <i>let-7</i> guide strand that creates 2 nt mismatches at g17g18:t17t18 when paired to <i>let-7</i> perfect target        | CCC ATT TAG GTG ACA CTA TAG ATT TAC ATC<br>GCG TTG AGT GTA GAA CGG TTG TAT AAA AGG<br><b>TTG AGG TAG TAG GTT GTT CAG TAT</b> CCA GAG<br>GAA TTC ATT ATC AGT G |
| Reverse primer for making <b>compensatory target</b> to modified <i>let-7</i> guide strand that creates 2 nt mismatches at g18g19:t18t19 when paired to <i>let-7</i> perfect target        | CCC ATT TAG GTG ACA CTA TAG ATT TAC ATC<br>GCG TTG AGT GTA GAA CGG TTG TAT AAA AGG<br><b>TTG AGG TAG TAG GTT GTA CTG TAT</b> CCA GAG<br>GAA TTC ATT ATC AGT G |
| Reverse primer for making <b>compensatory target</b> to modified <i>let-7</i> guide strand that creates 2 nt mismatches at g19g20:t19t20 when paired to <i>let-7</i> perfect target        | CCC ATT TAG GTG ACA CTA TAG ATT TAC ATC<br>GCG TTG AGT GTA GAA CGG TTG TAT AAA AGG<br><b>TTG AGG TAG TAG GTT GTA TTC TAT</b> CCA GAG<br>GAA TTC ATT ATC AGT G |

|                                                                                                                                                                                     |                                                                                                                                                                |
|-------------------------------------------------------------------------------------------------------------------------------------------------------------------------------------|----------------------------------------------------------------------------------------------------------------------------------------------------------------|
| Reverse primer for making <b>compensatory target</b> to modified <i>let-7</i> guide strand that creates 2 nt mismatches at g20g21:t20t21 when paired to <i>let-7</i> perfect target | CCC ATT TAG GTG ACA CTA TAG ATT TAC ATC<br>GCG TTG AGT GTA GAA CGG TTG TAT AAA AGG<br><b>TTG AGG TAG TAG GTT GTA TAT CAT</b> CCA GAG<br>GAA TTC ATT ATC AGT G  |
| Reverse primer for making <b>compensatory target</b> to modified <i>let-7</i> guide strand that creates 1 nt mismatch at g1:t1 when paired to <i>let-7</i> perfect target           | CCC ATT TAG GTG ACA CTA TAG ATT TAC ATC<br>GCG TTG AGT GTA GAA CGG TTG TAT AAA AGG<br><b>T CG AGG TAG TAG GTT GTA TAG TAT</b> CCA GAG<br>GAA TTC ATT ATC AGT G |
| Reverse primer for making <b>compensatory target</b> to modified <i>let-7</i> guide strand that creates 1 nt mismatch at g14:t14 when paired to <i>let-7</i> perfect target         | CCC ATT TAG GTG ACA CTA TAG ATT TAC ATC<br>GCG TTG AGT GTA GAA CGG TTG TAT AAA AGG<br><b>TTG AGG TAG TAG GTC GTA TAG TAT</b> CCA GAG<br>GAA TTC ATT ATC AGT G  |
| Reverse primer for making first <b>compensatory target</b> to modified <i>let-7</i> guide strand that creates 1 nt mismatch at g15:t15 when paired to <i>let-7</i> perfect target   | CCC ATT TAG GTG ACA CTA TAG ATT TAC ATC<br>GCG TTG AGT GTA GAA CGG TTG TAT AAA AGG<br><b>TTG AGG TAG TAG GTT ITA TAG TAT</b> CCA GAG<br>GAA TTC ATT ATC AGT G  |
| Reverse primer for making second <b>compensatory target</b> to modified <i>let-7</i> guide strand that creates 1 nt mismatch at g15:t15 when paired to <i>let-7</i> perfect target  | CCC ATT TAG GTG ACA CTA TAG ATT TAC ATC<br>GCG TTG AGT GTA GAA CGG TTG TAT AAA AGG<br><b>TTG AGG TAG TAG GTT ATA TAG TAT</b> CCA GAG<br>GAA TTC ATT ATC AGT G  |
| Reverse primer for first <b>compensatory target</b> to p21-976 modified <i>let-7</i> guide strand that creates 1 nt mismatch at g16:t16 when paired to <i>let-7</i> perfect target  | CCC ATT TAG GTG ACA CTA TAG ATT TAC ATC<br>GCG TTG AGT GTA GAA CGG TTG TAT AAA AGG<br><b>TTG AGG TAG TAG GTT GGA TAG TAT</b> CCA GAG<br>GAA TTC ATT ATC AGT G  |
| Reverse primer for making second <b>compensatory target</b> to modified <i>let-7</i> guide strand that creates 1 nt mismatch at g16:t16 when paired to <i>let-7</i> perfect target  | CCC ATT TAG GTG ACA CTA TAG ATT TAC ATC<br>GCG TTG AGT GTA GAA CGG TTG TAT AAA AGG<br><b>TTG AGG TAG TAG GTT GCA TAG TAT</b> CCA GAG<br>GAA TTC ATT ATC AGT G  |
| Reverse primer for making <b>compensatory target</b> to modified <i>let-7</i> guide strand that creates 1 nt mismatch at g17:t17 when paired to <i>let-7</i> perfect target         | CCC ATT TAG GTG ACA CTA TAG ATT TAC ATC<br>GCG TTG AGT GTA GAA CGG TTG TAT AAA AGG<br><b>TTG AGG TAG TAG GTT GTT TAG TAT</b> CCA GAG<br>GAA TTC ATT ATC AGT G  |
| Reverse primer for making <b>compensatory target</b> to modified <i>let-7</i> guide strand that creates 1 nt mismatch at g9:t9 when paired to <i>let-7</i> perfect target           | CCC ATT TAG GTG ACA CTA TAG ATT TAC ATC<br>GCG TTG AGT GTA GAA CGG TTG TAT AAA AGG<br><b>TTG AGG TAG CAG GTT GTA TAG TAT</b> CCA GAG<br>GAA TTC ATT ATC AGT G  |

|                                                                                                                                                                                       |                                                                                                                                                               |
|---------------------------------------------------------------------------------------------------------------------------------------------------------------------------------------|---------------------------------------------------------------------------------------------------------------------------------------------------------------|
| Reverse primer for making <b>compensatory target</b> to modified <i>let-7</i> guide strand that creates 1 nt mismatch at g10:t10 when paired to <i>let-7</i> perfect target           | CCC ATT TAG GTG ACA CTA TAG ATT TAC ATC<br>GCG TTG AGT GTA GAA CGG TTG TAT AAA AGG<br><b>TTG AGG TAG TTG GTT GTA TAG TAT CCA GAG</b><br>GAA TTC ATT ATC AGT G |
| Reverse primer for making <b>compensatory target</b> to modified <i>let-7</i> guide strand that creates 1 nt mismatch at g11:t11 when paired to <i>let-7</i> perfect target           | CCC ATT TAG GTG ACA CTA TAG ATT TAC ATC<br>GCG TTG AGT GTA GAA CGG TTG TAT AAA AGG<br><b>TTG AGG TAG TAA GTT GTA TAG TAT CCA GAG</b><br>GAA TTC ATT ATC AGT G |
| Reverse primer for making <b>compensatory target</b> to modified <i>let-7</i> guide strand that creates 1 nt mismatch at g12:t12 when paired to <i>let-7</i> perfect target           | CCC ATT TAG GTG ACA CTA TAG ATT TAC ATC<br>GCG TTG AGT GTA GAA CGG TTG TAT AAA AGG<br><b>TTG AGG TAG TAG ATT GTA TAG TAT CCA GAG</b><br>GAA TTC ATT ATC AGT G |
| Reverse primer for making <b>compensatory target</b> to modified <i>let-7</i> guide strand that creates 3 nt mismatches at g15–g17:t15–t17 when paired to <i>let-7</i> perfect target | CCC ATT TAG GTG ACA CTA TAG ATT TAC ATC<br>GCG TTG AGT GTA GAA CGG TTG TAT AAA AGG<br><b>TTG AGG TAG TAG GTT TCT TAG TAT CCA GAG</b><br>GAA TTC ATT ATC AGT G |
| Reverse primer for making <b>compensatory target</b> to modified <i>let-7</i> guide strand that creates 4 nt mismatches at g14–g17:t14–t17 when paired to <i>let-7</i> perfect target | CCC ATT TAG GTG ACA CTA TAG ATT TAC ATC<br>GCG TTG AGT GTA GAA CGG TTG TAT AAA AGG<br><b>TTG AGG TAG TAG GTC TCT TAG TAT CCA GAG</b><br>GAA TTC ATT ATC AGT G |
| Reverse primer for making <b>compensatory target</b> to modified <i>let-7</i> guide strand that creates 5 nt mismatches at g17–g21:t17–t21 when paired to <i>let-7</i> perfect target | CCC ATT TAG GTG ACA CTA TAG ATT TAC ATC<br>GCG TTG AGT GTA GAA CGG TTG TAT AAA AGG<br><b>TTG AGG TAG TAG GTT GTT CTC CAT CCA GAG</b><br>GAA TTC ATT ATC AGT G |
| Reverse primer for making <b>compensatory target</b> to modified <i>let-7</i> guide strand that creates 6 nt mismatches at g16–g21:t16–t21 when paired to <i>let-7</i> perfect target | CCC ATT TAG GTG ACA CTA TAG ATT TAC ATC<br>GCG TTG AGT GTA GAA CGG TTG TAT AAA AGG<br><b>TTG AGG TAG TAG GTT GCT CTC CAT CCA GAG</b><br>GAA TTC ATT ATC AGT G |
| Reverse primer for making <b>compensatory target</b> to modified <i>let-7</i> guide strand that creates 7 nt mismatches at g15–g21:t15–t21 when paired to <i>let-7</i> perfect target | CCC ATT TAG GTG ACA CTA TAG ATT TAC ATC<br>GCG TTG AGT GTA GAA CGG TTG TAT AAA AGG<br><b>TTG AGG TAG TAG GTT TCT CTC CAT CCA GAG</b><br>GAA TTC ATT ATC AGT G |
| Reverse primer for making <b>compensatory target</b> to modified <i>let-7</i> guide strand that creates 8 nt mismatches at g14–g21:t14–t21 when paired to <i>let-7</i> perfect target | CCC ATT TAG GTG ACA CTA TAG ATT TAC ATC<br>GCG TTG AGT GTA GAA CGG TTG TAT AAA AGG<br><b>TTG AGG TAG TAG GTC TCT CTC CAT CCA GAG</b><br>GAA TTC ATT ATC AGT G |

|                                                                                                                                           |                                                                                                                                                                        |
|-------------------------------------------------------------------------------------------------------------------------------------------|------------------------------------------------------------------------------------------------------------------------------------------------------------------------|
| Reverse primer for making complementary target to <i>Renilla reniformis</i> luciferase derived siRNA guide strand                         | CCC ATT TAG GTG ACA CTA TAG ATT TAC ATC<br>GCG TTG AGT GTA GAA CGG TTG TAT AAA AGG<br>TAT AGC TAT AAT GAA ATG CCT TAT CCA GAG<br>GAA TTC ATT ATC AGT G                 |
| Reverse primer for making target to <i>Renilla reniformis</i> luciferase derived siRNA guide strand with 1 nt mismatch at g4:t4           | CCC ATT TAG GTG ACA CTA TAG ATT TAC ATC<br>GCG TTG AGT GTA GAA CGG TTG TAT AAA AGG<br>TAT A <u>T</u> C TAT AAT GAA ATG CCT TAT CCA GAG<br>GAA TTC ATT ATC AGT G        |
| Reverse primer for making target to <i>Renilla reniformis</i> luciferase derived siRNA guide strand with 2 nt mismatches at g8g9:t8t9     | CCC ATT TAG GTG ACA CTA TAG ATT TAC ATC<br>GCG TTG AGT GTA GAA CGG TTG TAT AAA AGG<br>TAT AGC TAG <u>C</u> A <u>T</u> GAA ATG CCT TAT CCA GAG<br>GAA TTC ATT ATC AGT G |
| Reverse primer for making target to <i>Renilla reniformis</i> luciferase derived siRNA guide strand with 2 nt mismatches at g15g16:t15t16 | CCC ATT TAG GTG ACA CTA TAG ATT TAC ATC<br>GCG TTG AGT GTA GAA CGG TTG TAT AAA AGG<br>TAT AGC TAT AAT GAA <u>C</u> G <u>G</u> CCT TAT CCA GAG<br>GAA TTC ATT ATC AGT G |

**Table S2C, related to Figure 1.** RNA transcripts used in this study.

| Description                                                                                                                                                       | Sequence<br>(siRNA pairing site, change from <i>let-7</i> complement)                                                                                                                                                                                                              |
|-------------------------------------------------------------------------------------------------------------------------------------------------------------------|------------------------------------------------------------------------------------------------------------------------------------------------------------------------------------------------------------------------------------------------------------------------------------|
| Transcript with perfect target site to <i>let-7</i> guide strand                                                                                                  | GGG UCA CAU CUC AUC UAC CUC CCG GUU UUA AUG AAU<br>ACG AUU UUG UAC CAG AGU CCU UUG AUC GUG ACA AAA<br>CAA UUG CAC UGA UAA UGA AUU CCU CUG GAU <b>ACU AUA</b><br><b>CAA CCU ACU ACC UCA</b> ACC UUU UAU ACA ACC GUU CUA<br>CAC UCA ACG CGA UGU AAA UCU AUA GUG UCA CCU AAA<br>UGG G |
| Transcript with perfect target site to <i>let-7</i> passenger strand                                                                                              | GGG UCA CAU CUC AUC UAC CUC CCG GUU UUA AUG AAU<br>ACG AUU UUG UAC CAG AGU CCU UUG AUC GUG ACA AAA<br>CAA UUG CAC UGA UAA UGA AUU CCU CUG GAU <b>AAA GAG</b><br><b>GUA GUA GGU UGU AUA</b> ACC UUU UAU ACA ACC GUU CUA<br>CAC UCA ACG CGA UGU AAA UCU AUA GUG UCA CCU AAA<br>UGG G |
| Transcript with <b>compensatory</b> target site to <i>let-7</i> guide strand that creates 2 nt mismatches at g1g2:t1t2 when paired to <i>let-7</i> perfect target | GGG UCA CAU CUC AUC UAC CUC CCG GUU UUA AUG AAU<br>ACG AUU UUG UAC CAG AGU CCU UUG AUC GUG ACA AAA<br>CAA UUG CAC UGA UAA UGA AUU CCU CUG GAU <b>ACU AUA</b><br><b>CAA CCU ACU ACC UAG</b> ACC UUU UAU ACA ACC GUU CUA<br>CAC UCA ACG CGA UGU AAA UCU AUA GUG UCA CCU AAA<br>UGG G |
| Transcript with <b>compensatory</b> target site to <i>let-7</i> guide strand that creates 2 nt mismatches at g2g3:t2t3 when paired to <i>let-7</i> perfect target | GGG UCA CAU CUC AUC UAC CUC CCG GUU UUA AUG AAU<br>ACG AUU UUG UAC CAG AGU CCU UUG AUC GUG ACA AAA<br>CAA UUG CAC UGA UAA UGA AUU CCU CUG GAU <b>ACU AUA</b><br><b>CAA CCU ACU ACC GAA</b> ACC UUU UAU ACA ACC GUU CUA<br>CAC UCA ACG CGA UGU AAA UCU AUA GUG UCA CCU AAA<br>UGG G |
| Transcript with <b>compensatory</b> target site to <i>let-7</i> guide strand that creates 2 nt mismatches at g3g4:t3t4 when paired to <i>let-7</i> perfect target | GGG UCA CAU CUC AUC UAC CUC CCG GUU UUA AUG AAU<br>ACG AUU UUG UAC CAG AGU CCU UUG AUC GUG ACA AAA<br>CAA UUG CAC UGA UAA UGA AUU CCU CUG GAU <b>ACU AUA</b><br><b>CAA CCU ACU ACG ACA</b> ACC UUU UAU ACA ACC GUU CUA<br>CAC UCA ACG CGA UGU AAA UCU AUA GUG UCA CCU AAA<br>UGG G |
| Transcript with <b>compensatory</b> target site to <i>let-7</i> guide strand that creates 2 nt mismatches at g4g5:t4t5 when paired to <i>let-7</i> perfect target | GGG UCA CAU CUC AUC UAC CUCCCG GUU UUA AUG AAU<br>ACG AUU UUG UAC CAG AGU CCU UUG AUC GUG ACA AAA<br>CAA UUG CAC UGA UAA UGA AUU CCU CUG GAU <b>ACU AUA</b><br><b>CAA CCU ACU AGA UCA</b> ACC UUU UAU ACA ACC GUU CUA<br>CAC UCA ACG CGA UGU AAA UCU AUA GUG UCA CCU AAA<br>UGG G  |
| Transcript with <b>compensatory</b> target site to <i>let-7</i> guide strand that creates 2 nt mismatches at g5g6:t5t6 when paired to <i>let-7</i> perfect target | GGG UCA CAU CUC AUC UAC CUC CCG GUU UUA AUG AAU<br>ACG AUU UUG UAC CAG AGU CCU UUG AUC GUG ACA AAA<br>CAA UUG CAC UGA UAA UGA AUU CCU CUG GAU <b>ACU AUA</b><br><b>CAA CCU ACU GAC UCA</b> ACC UUU UAU ACA ACC GUU CUA<br>CAC UCA ACG CGA UGU AAA UCU AUA GUG UCA CCU AAA<br>UGG G |



|                                                                                                                                                                              |                                                                                                                                                                                                                                                                                    |
|------------------------------------------------------------------------------------------------------------------------------------------------------------------------------|------------------------------------------------------------------------------------------------------------------------------------------------------------------------------------------------------------------------------------------------------------------------------------|
| Transcript with <b>compensatory</b> target site to <i>let-7</i> guide strand that creates 2 nt mismatches at g6g7:t6t7 when paired to <i>let-7</i> perfect target            | GGG UCA CAU CUC AUC UAC CUC CCG GUU UUA AUG AAU<br>ACG AUU UUG UAC CAG AGU CCU UUG AUC GUG ACA AAA<br>CAA UUG CAC UGA UAA UGA AUU CCU CUG GAU <b>ACU AUA</b><br><b>CAA CCU ACA GCC UCA</b> ACC UUU UAU ACA ACC GUU CUA<br>CAC UCA ACG CGA UGU AAA UCU AUA GUG UCA CCU AAA<br>UGG G |
| Transcript with <b>compensatory</b> target site to <i>let-7</i> guide strand that creates 2 nt mismatches at g7g8:t7t8 when paired to <i>let-7</i> perfect target            | GGG UCA CAU CUC AUC UAC CUC CCG GUU UUA AUG AAU<br>ACG AUU UUG UAC CAG AGU CCU UUG AUC GUG ACA AAA<br>CAA UUG CAC UGA UAA UGA AUU CCU CUG GAU <b>ACU AUA</b><br><b>CAA CCU AGA ACC UCA</b> ACC UUU UAU ACA ACC GUU CUA<br>CAC UCA ACG CGA UGU AAA UCU AUA GUG UCA CCU AAA<br>UGG G |
| Transcript with <b>compensatory</b> target site to <i>let-7</i> guide strand that creates 2 nt mismatches at g8g9:t8t9 when paired to <i>let-7</i> perfect target            | GGG UCA CAU CUC AUC UAC CUC CCG GUU UUA AUG AAU<br>ACG AUU UUG UAC CAG AGU CCU UUG AUC GUG ACA AAA<br>CAA UUG CAC UGA UAA UGA AUU CCU CUG GAU <b>ACU AUA</b><br><b>CAA CCU GAU ACC UCA</b> ACC UUU UAU ACA ACC GUU CUA<br>CAC UCA ACG CGA UGU AAA UCU AUA GUG UCA CCU AAA<br>UGG G |
| Transcript with <b>compensatory</b> target site to <i>let-7</i> guide strand that creates 2 nt mismatches at g9g10:t9t10 when paired to <i>let-7</i> perfect target          | GGG UCA CAU CUC AUC UAC CUC CCG GUU UUA AUG AAU<br>ACG AUU UUG UAC CAG AGU CCU UUG AUC GUG ACA AAA<br>CAA UUG CAC UGA UAA UGA AUU CCU CUG GAU <b>ACU AUA</b><br><b>CAA CCA GCU ACC UCA</b> ACC UUU UAU ACA ACC GUU CUA<br>CAC UCA ACG CGA UGU AAA UCU AUA GUG UCA CCU AAA<br>UGG G |
| First transcript with <b>compensatory</b> target site to <i>let-7</i> guide strand that creates 2 nt mismatches at g10g11:t10t11 when paired to <i>let-7</i> perfect target  | GGG UCA CAU CUC AUC UAC CUC CCG GUU UUA AUG AAU<br>ACG AUU UUG UAC CAG AGU CCU UUG AUC GUG ACA AAA<br>CAA UUG CAC UGA UAA UGA AUU CCU CUG GAU <b>ACU AUA</b><br><b>CAA CCG CCU ACC UCA</b> ACC UUU UAU ACA ACC GUU CUA<br>CAC UCA ACG CGA UGU AAA UCU AUA GUG UCA CCU AAA<br>UGG G |
| Second transcript with <b>compensatory</b> target site to <i>let-7</i> guide strand that creates 2 nt mismatches at g10g11:t10t11 when paired to <i>let-7</i> perfect target | GGG UCA CAU CUC AUC UAC CUC CCG GUU UUA AUG AAU<br>ACG AUU UUG UAC CAG AGU CCU UUG AUC GUG ACA AAA<br>CAA UUG CAC UGA UAA UGA AUU CCU CUG GAU <b>ACU AUA</b><br><b>CAA CGA ACU ACC UCA</b> ACC UUU UAU ACA ACC GUU CUA<br>CAC UCA ACG CGA UGU AAA UCU AUA GUG UCA CCU AAA<br>UGG G |
| Third transcript with <b>compensatory</b> target site to <i>let-7</i> guide strand that creates 2 nt mismatches at g10g11:t10t11 when paired to <i>let-7</i> perfect target  | GGG UCA CAU CUC AUC UAC CUC CCG GUU UUA AUG AAU<br>ACG AUU UUG UAC CAG AGU CCU UUG AUC GUG ACA AAA<br>CAA UUG CAC UGA UAA UGA AUU CCU CUG GAU <b>ACU AUA</b><br><b>CAA CUG ACU ACC UCA</b> ACC UUU UAU ACA ACC GUU CUA<br>CAC UCA ACG CGA UGU AAA UCU AUA GUG UCA CCU AAA<br>UGG G |
| First transcript with <b>compensatory</b> target site to <i>let-7</i> guide strand that creates 2 nt mismatches at g11g12:t11t12 when paired to <i>let-7</i> perfect target  | GGG UCA CAU CUC AUC UAC CUC CCG GUU UUA AUG AAU<br>ACG AUU UUG UAC CAG AGU CCU UUG AUC GUG ACA AAA<br>CAA UUG CAC UGA UAA UGA AUU CCU CUG GAU <b>ACU AUA</b><br><b>CAA UUU ACU ACC UCA</b> ACC UUU UAU ACA ACC GUU CUA<br>CAC UCA ACG CGA UGU AAA UCU AUA GUG UCA CCU AAA<br>UGG G |

|                                                                                                                                                                              |                                                                                                                                                                                                                                                                              |
|------------------------------------------------------------------------------------------------------------------------------------------------------------------------------|------------------------------------------------------------------------------------------------------------------------------------------------------------------------------------------------------------------------------------------------------------------------------|
| Second transcript with <b>compensatory</b> target site to <i>let-7</i> guide strand that creates 2 nt mismatches at g11g12:t11t12 when paired to <i>let-7</i> perfect target | GGG UCA CAU CUC AUC UAC CUC CCG GUU UUA AUG AAU<br>ACG AUU UUG UAC CAG AGU CCU UUG AUC GUG ACA AAA<br>CAA UUG CAC UGA UAA UGA AUU CCU CUG GAU <b>ACU AUA<br/>CAA AAU ACU ACC UCA</b> ACC UUU UAU ACA ACC GUU CUA<br>CAC UCA ACG CGA UGU AAA UCU AUA GUG UCA CCU AAA<br>UGG G |
| Third transcript with <b>compensatory</b> target site to <i>let-7</i> guide strand that creates 2 nt mismatches at g11g12:t11t12 when paired to <i>let-7</i> perfect target  | GGG UCA CAU CUC AUC UAC CUC CCG GUU UUA AUG AAU<br>ACG AUU UUG UAC CAG AGU CCU UUG AUC GUG ACA AAA<br>CAA UUG CAC UGA UAA UGA AUU CCU CUG GAU <b>ACU AUA<br/>CAA UAU ACU ACC UCA</b> ACC UUU UAU ACA ACC GUU CUA<br>CAC UCA ACG CGA UGU AAA UCU AUA GUG UCA CCU AAA<br>UGG G |
| Fourth transcript with <b>compensatory</b> target site to <i>let-7</i> guide strand that creates 2 nt mismatches at g11g12:t11t12 when paired to <i>let-7</i> perfect target | GGG UCA CAU CUC AUC UAC CUC CCG GUU UUA AUG AAU<br>ACG AUU UUG UAC CAG AGU CCU UUG AUC GUG ACA AAA<br>CAA UUG CAC UGA UAA UGA AUU CCU CUG GAU <b>ACU AUA<br/>CAA GAU ACU ACC UCA</b> ACC UUU UAU ACA ACC GUU CUA<br>CAC UCA ACG CGA UGU AAA UCU AUA GUG UCA CCU AAA<br>UGG G |
| Transcript with <b>compensatory</b> target site to <i>let-7</i> guide strand that creates 2 nt mismatches at g12g13:t12t13 when paired to <i>let-7</i> perfect target        | GGG UCA CAU CUC AUC UAC CUC CCG GUU UUA AUG AAU<br>ACG AUU UUG UAC CAG AGU CCU UUG AUC GUG ACA AAA<br>CAA UUG CAC UGA UAA UGA AUU CCU CUG GAU <b>ACU AUA<br/>CAG ACU ACU ACC UCA</b> ACC UUU UAU ACA ACC GUU CUA<br>CAC UCA ACG CGA UGU AAA UCU AUA GUG UCA CCU AAA<br>UGG G |
| Transcript with <b>compensatory</b> target site to <i>let-7</i> guide strand that creates 2 nt mismatches at g13g14:t13t14 when paired to <i>let-7</i> perfect target        | GGG UCA CAU CUC AUC UAC CUC CCG GUU UUA AUG AAU<br>ACG AUU UUG UAC CAG AGU CCU UUG AUC GUG ACA AAA<br>CAA UUG CAC UGA UAA UGA AUU CCU CUG GAU <b>ACU AUA<br/>CGG CCU ACU ACC UCA</b> ACC UUU UAU ACA ACC GUU CUA<br>CAC UCA ACG CGA UGU AAA UCU AUA GUG UCA CCU AAA<br>UGG G |
| Transcript with <b>compensatory</b> target site to <i>let-7</i> guide strand that creates 2 nt mismatches at g14g15:t14t15 when paired to <i>let-7</i> perfect target        | GGG UCA CAU CUC AUC UAC CUC CCG GUU UUA AUG AAU<br>ACG AUU UUG UAC CAG AGU CCU UUG AUC GUG ACA AAA<br>CAA UUG CAC UGA UAA UGA AUU CCU CUG GAU <b>ACU AUA<br/>AGA CCU ACU ACC UCA</b> ACC UUU UAU ACA ACC GUU CUA<br>CAC UCA ACG CGA UGU AAA UCU AUA GUG UCA CCU AAA<br>UGG G |
| First transcript with <b>compensatory</b> target site to <i>let-7</i> guide strand that creates 2 nt mismatches at g15g16:t15t16 when paired to <i>let-7</i> perfect target  | GGG UCA CAU CUC AUC UAC CUC CCG GUU UUA AUG AAU<br>ACG AUU UUG UAC CAG AGU CCU UUG AUC GUG ACA AAA<br>CAA UUG CAC UGA UAA UGA AUU CCU CUG GAU <b>ACU AUG<br/>AAA CCU ACU ACC UCA</b> ACC UUU UAU ACA ACC GUU CUA<br>CAC UCA ACG CGA UGU AAA UCU AUA GUG UCA CCU AAA<br>UGG G |
| Second transcript with <b>compensatory</b> target site to <i>let-7</i> guide strand that creates 2 nt mismatches at g15g16:t15t16 when paired to <i>let-7</i> perfect target | GGG UCA CAU CUC AUC UAC CUC CCG GUU UUA AUG AAU<br>ACG AUU UUG UAC CAG AGU CCU UUG AUC GUG ACA AAA<br>CAA UUG CAC UGA UAA UGA AUU CCU CUG GAU <b>ACU AUC<br/>UAA CCU ACU ACC UCA</b> ACC UUU UAU ACA ACC GUU CUA<br>CAC UCA ACG CGA UGU AAA UCU AUA GUG UCA CCU AAA<br>UGG G |

|                                                                                                                                                                       |                                                                                                                                                                                                                                                                                    |
|-----------------------------------------------------------------------------------------------------------------------------------------------------------------------|------------------------------------------------------------------------------------------------------------------------------------------------------------------------------------------------------------------------------------------------------------------------------------|
| Transcript with <b>compensatory</b> target site to <i>let-7</i> guide strand that creates 2 nt mismatches at g16g17:t16t17 when paired to <i>let-7</i> perfect target | GGG UCA CAU CUC AUC UAC CUC CCG GUU UUA AUG AAU<br>ACG AUU UUG UAC CAG AGU CCU UUG AUC GUG ACA AAA<br>CAA UUG CAC UGA UAA UGA AUU CCU CUG GAU <b>ACU AAG</b><br><b>CAA CCU ACU ACC UCA</b> ACC UUU UAU ACA ACC GUU CUA<br>CAC UCA ACG CGA UGU AAA UCU AUA GUG UCA CCU AAA<br>UGG G |
| Transcript with <b>compensatory</b> target site to <i>let-7</i> guide strand that creates 2 nt mismatches at g17g18:t17t18 when paired to <i>let-7</i> perfect target | GGG UCA CAU CUC AUC UAC CUC CCG GUU UUA AUG AAU<br>ACG AUU UUG UAC CAG AGU CCU UUG AUC GUG ACA AAA<br>CAA UUG CAC UGA UAA UGA AUU CCU CUG GAU <b>ACU GAA</b><br><b>CAA CCU ACU ACC UCA</b> ACC UUU UAU ACA ACC GUU CUA<br>CAC UCA ACG CGA UGU AAA UCU AUA GUG UCA CCU AAA<br>UGG G |
| Transcript with <b>compensatory</b> target site to <i>let-7</i> guide strand that creates 2 nt mismatches at g18g19:t18t19 when paired to <i>let-7</i> perfect target | GGG UCA CAU CUC AUC UAC CUC CCG GUU UUA AUG AAU<br>ACG AUU UUG UAC CAG AGU CCU UUG AUC GUG ACA AAA<br>CAA UUG CAC UGA UAA UGA AUU CCU CUG GAU <b>ACA GUA</b><br><b>CAA CCU ACU ACC UCA</b> ACC UUU UAU ACA ACC GUU CUA<br>CAC UCA ACG CGA UGU AAA UCU AUA GUG UCA CCU AAA<br>UGG G |
| Transcript with <b>compensatory</b> target site to <i>let-7</i> guide strand that creates 2 nt mismatches at g19g20:t19t20 when paired to <i>let-7</i> perfect target | GGG UCA CAU CUC AUC UAC CUC CCG GUU UUA AUG AAU<br>ACG AUU UUG UAC CAG AGU CCU UUG AUC GUG ACA AAA<br>CAA UUG CAC UGA UAA UGA AUU CCU CUG GAU <b>AGA AUA</b><br><b>CAA CCU ACU ACC UCA</b> ACC UUU UAU ACA ACC GUU CUA<br>CAC UCA ACG CGA UGU AAA UCU AUA GUG UCA CCU AAA<br>UGG G |
| Transcript with <b>compensatory</b> target site to <i>let-7</i> guide strand that creates 2 nt mismatches at g20g21:t20t21 when paired to <i>let-7</i> perfect target | GGG UCA CAU CUC AUC UAC CUC CCG GUU UUA AUG AAU<br>ACG AUU UUG UAC CAG AGU CCU UUG AUC GUG ACA AAA<br>CAA UUG CAC UGA UAA UGA AUU CCU CUG GAU <b>GAU AUA</b><br><b>CAA CCU ACU ACC UCA</b> ACC UUU UAU ACA ACC GUU CUA<br>CAC UCA ACG CGA UGU AAA UCU AUA GUG UCA CCU AAA<br>UGG G |
| Transcript with <b>compensatory</b> target site to <i>let-7</i> guide strand that creates 1 nt mismatch at g1:t1 when paired to <i>let-7</i> perfect target           | GGG UCA CAU CUC AUC UAC CUC CCG GUU UUA AUG AAU<br>ACG AUU UUG UAC CAG AGU CCU UUG AUC GUG ACA AAA<br>CAA UUG CAC UGA UAA UGA AUU CCU CUG GAU <b>ACU AUA</b><br><b>CAA CCU ACU ACC UCG</b> ACC UUU UAU ACA ACC GUU CUA<br>CAC UCA ACG CGA UGU AAA UCU AUA GUG UCA CCU AAA<br>UGG G |
| Transcript with <b>compensatory</b> target site to <i>let-7</i> guide strand that creates 1 nt mismatch at g14:t14 when paired to <i>let-7</i> perfect target         | GGG UCA CAU CUC AUC UAC CUC CCG GUU UUA AUG AAU<br>ACG AUU UUG UAC CAG AGU CCU UUG AUC GUG ACA AAA<br>CAA UUG CAC UGA UAA UGA AUU CCU CUG GAU <b>ACU AUA</b><br><b>CGA CCU ACU ACC UCA</b> ACC UUU UAU ACA ACC GUU CUA<br>CAC UCA ACG CGA UGU AAA UCU AUA GUG UCA CCU AAA<br>UGG G |
| First transcript with <b>compensatory</b> target site to <i>let-7</i> guide strand that creates 1 nt mismatch at g15:t15 when paired to <i>let-7</i> perfect target   | GGG UCA CAU CUC AUC UAC CUC CCG GUU UUA AUG AAU<br>ACG AUU UUG UAC CAG AGU CCU UUG AUC GUG ACA AAA<br>CAA UUG CAC UGA UAA UGA AUU CCU CUG GAU <b>ACU AUA</b><br><b>AAA CCU ACU ACC UCA</b> ACC UUU UAU ACA ACC GUU CUA<br>CAC UCA ACG CGA UGU AAA UCU AUA GUG UCA CCU AAA<br>UGG G |
|                                                                                                                                                                       |                                                                                                                                                                                                                                                                                    |

|                                                                                                                                                                        |                                                                                                                                                                                                                                                                                    |
|------------------------------------------------------------------------------------------------------------------------------------------------------------------------|------------------------------------------------------------------------------------------------------------------------------------------------------------------------------------------------------------------------------------------------------------------------------------|
| Second transcript with <b>compensatory</b> target site to <i>let-7</i> guide strand that creates 1 nt mismatch at g15:t15 when paired to <i>let-7</i> perfect target   | GGG UCA CAU CUC AUC UAC CUC CCG GUU UUA AUG AAU<br>ACG AUU UUG UAC CAG AGU CCU UUG AUC GUG ACA AAA<br>CAA UUG CAC UGA UAA UGA AUU CCU CUG GAU <b>ACU AUA</b><br><b>UAA CCU ACU ACC UCA</b> ACC UUU UAU ACA ACC GUU CUA<br>CAC UCA ACG CGA UGU AAA UCU AUA GUG UCA CCU AAA<br>UGG G |
| First transcript with <b>compensatory</b> target site to <i>let-7</i> guide strand that creates 1 nt mismatch at g16:t16 when paired to <i>let-7</i> perfect target    | GGG UCA CAU CUC AUC UAC CUC CCG GUU UUA AUG AAU<br>ACG AUU UUG UAC CAG AGU CCU UUG AUC GUG ACA AAA<br>CAA UUG CAC UGA UAA UGA AUU CCU CUG GAU <b>ACU AUC</b><br><b>CAA CCU ACU ACC UCA</b> ACC UUU UAU ACA ACC GUU CUA<br>CAC UCA ACG CGA UGU AAA UCU AUA GUG UCA CCU AAA<br>UGG G |
| Second transcript with <b>compensatory</b> target site to <i>let-7</i> guide strand that creates 1 nt mismatches at g16:t16 when paired to <i>let-7</i> perfect target | GGG UCA CAU CUC AUC UAC CUC CCG GUU UUA AUG AAU<br>ACG AUU UUG UAC CAG AGU CCU UUG AUC GUG ACA AAA<br>CAA UUG CAC UGA UAA UGA AUU CCU CUG GAU <b>ACU AUG</b><br><b>CAA CCU ACU ACC UCA</b> ACC UUU UAU ACA ACC GUU CUA<br>CAC UCA ACG CGA UGU AAA UCU AUA GUG UCA CCU AAA<br>UGG G |
| Transcript with <b>compensatory</b> target site to <i>let-7</i> guide strand that creates 1 nt mismatch at g17:t17 when paired to <i>let-7</i> perfect target          | GGG UCA CAU CUC AUC UAC CUC CCG GUU UUA AUG AAU<br>ACG AUU UUG UAC CAG AGU CCU UUG AUC GUG ACA AAA<br>CAA UUG CAC UGA UAA UGA AUU CCU CUG GAU <b>ACU AAA</b><br><b>CAA CCU ACU ACC UCA</b> ACC UUU UAU ACA ACC GUU CUA<br>CAC UCA ACG CGA UGU AAA UCU AUA GUG UCA CCU AAA<br>UGG G |
| Transcript with <b>compensatory</b> target site to <i>let-7</i> guide strand that creates 1 nt mismatch at g9:t9 when paired to <i>let-7</i> perfect target            | GGG UCA CAU CUC AUC UAC CUC CCG GUU UUA AUG AAU<br>ACG AUU UUG UAC CAG AGU CCU UUG AUC GUG ACA AAA<br>CAA UUG CAC UGA UAA UGA AUU CCU CUG GAU <b>ACU AUA</b><br><b>CAA CCU GCU ACC UCA</b> ACC UUU UAU ACA ACC GUU CUA<br>CAC UCA ACG CGA UGU AAA UCU AUA GUG UCA CCU AAA<br>UGG G |
| Transcript with <b>compensatory</b> target site to <i>let-7</i> guide strand that creates 1 nt mismatch at g10:t10 when paired to <i>let-7</i> perfect target          | GGG UCA CAU CUC AUC UAC CUC CCG GUU UUA AUG AAU<br>ACG AUU UUG UAC CAG AGU CCU UUG AUC GUG ACA AAA<br>CAA UUG CAC UGA UAA UGA AUU CCU CUG GAU <b>ACU AUA</b><br><b>CAA CCA ACU ACC UCA</b> ACC UUU UAU ACA ACC GUU CUA<br>CAC UCA ACG CGA UGU AAA UCU AUA GUG UCA CCU AAA<br>UGG G |
| Transcript with <b>compensatory</b> target site to <i>let-7</i> guide strand that creates 1 nt mismatch at g11:t11 when paired to <i>let-7</i> perfect target          | GGG UCA CAU CUC AUC UAC CUC CCG GUU UUA AUG AAU<br>ACG AUU UUG UAC CAG AGU CCU UUG AUC GUG ACA AAA<br>CAA UUG CAC UGA UAA UGA AUU CCU CUG GAU <b>ACU AUA</b><br><b>CAA CUU ACU ACC UCA</b> ACC UUU UAU ACA ACC GUU CUA<br>CAC UCA ACG CGA UGU AAA UCU AUA GUG UCA CCU AAA<br>UGG G |
| Transcript with <b>compensatory</b> target site to <i>let-7</i> guide strand that creates 1 nt mismatch at g12:t12 when paired to <i>let-7</i> perfect target          | GGG UCA CAU CUC AUC UAC CUC CCG GUU UUA AUG AAU<br>ACG AUU UUG UAC CAG AGU CCU UUG AUC GUG ACA AAA<br>CAA UUG CAC UGA UAA UGA AUU CCU CUG GAU <b>ACU AUA</b><br><b>CAA UCU ACU ACC UCA</b> ACC UUU UAU ACA ACC GUU CUA<br>CAC UCA ACG CGA UGU AAA UCU AUA GUG UCA CCU AAA<br>UGG G |

|                                                                                                                                                                         |                                                                                                                                                                                                                                                                                    |
|-------------------------------------------------------------------------------------------------------------------------------------------------------------------------|------------------------------------------------------------------------------------------------------------------------------------------------------------------------------------------------------------------------------------------------------------------------------------|
| Transcript with <b>compensatory</b> target site to <i>let-7</i> guide strand that creates 3 nt mismatches at g15–g17:t15–t17 when paired to <i>let-7</i> perfect target | GGG UCA CAU CUC AUC UAC CUC CCG GUU UUA AUG AAU<br>ACG AUU UUG UAC CAG AGU CCU UUG AUC GUG ACA AAA<br>CAA UUG CAC UGA UAA UGA AUU CCU CUG GAU <b>ACU AAG</b><br><b>AAA CCU ACU ACC UCA</b> ACC UUU UAU ACA ACC GUU CUA<br>CAC UCA ACG CGA UGU AAA UCU AUA GUG UCA CCU AAA<br>UGG G |
| Transcript with <b>compensatory</b> target site to <i>let-7</i> guide strand that creates 4 nt mismatches at g14–g17:t14–t17 when paired to <i>let-7</i> perfect target | GGG UCA CAU CUC AUC UAC CUC CCG GUU UUA AUG AAU<br>ACG AUU UUG UAC CAG AGU CCU UUG AUC GUG ACA AAA<br>CAA UUG CAC UGA UAA UGA AUU CCU CUG GAU <b>ACU AAG</b><br><b>AGA CCU AAG AGC UCA</b> ACC UUU UAU ACA ACC GUU CUA<br>CAC UCA ACG CGA UGU AAA UCU AUA GUG UCA CCU AAA<br>UGG G |
| Transcript with <b>compensatory</b> target site to <i>let-7</i> guide strand that creates 5 nt mismatches at g17–g21:t17–t21 when paired to <i>let-7</i> perfect target | GGG UCA CAU CUC AUC UAC CUC CCG GUU UUA AUG AAU<br>ACG AUU UUG UAC CAG AGU CCU UUG AUC GUG ACA AAA<br>CAA UUG CAC UGA UAA UG AUU CCU CUG GAU <b>GGA GAA</b><br><b>CAA CCU ACU ACC UCA</b> ACC UUU UAU ACA ACC GUU CUA<br>CAC UCA ACG CGA UGU AAA UCU AUA GUG UCA CCU AAA<br>UGG G  |
| Transcript with <b>compensatory</b> target site to <i>let-7</i> guide strand that creates 6 nt mismatches at g16–g21:t16–t21 when paired to <i>let-7</i> perfect target | GGG UCA CAU CUC AUC UAC CUC CCG GUU UUA AUG AAU<br>ACG AUU UUG UAC CAG AGU CCU UUG AUC GUG ACA AAA<br>CAA UUG CAC UGA UAA UGA AUU CCU CUG GAU <b>GGA GAG</b><br><b>CAA CCU ACU ACC UCA</b> ACC UUU UAU ACA ACC GUU CUA<br>CAC UCA ACG CGA UGU AAA UCU AUA GUG UCA CCU AAA<br>UGG G |
| Transcript with <b>compensatory</b> target site to <i>let-7</i> guide strand that creates 7 nt mismatches at g15–g21:t15–t21 when paired to <i>let-7</i> perfect target | GGG UCA CAU CUC AUC UAC CUC CCG GUU UUA AUG AAU<br>ACG AUU UUG UAC CAG AGU CCU UUG AUC GUG ACA AAA<br>CAA UUG CAC UGA UAA UGA AUU CCU CUG GAU <b>GGA GAG</b><br><b>AAA CCU ACU ACC UCA</b> ACC UUU UAU ACA ACC GUU CUA<br>CAC UCA ACG CGA UGU AAA UCU AUA GUG UCA CCU AAA<br>UGG G |
| Transcript with <b>compensatory</b> target site to <i>let-7</i> guide strand that creates 8 nt mismatches at g14–g21:t14–t21 when paired to <i>let-7</i> perfect target | GGG UCA CAU CUC AUC UAC CUC CCG GUU UUA AUG AAU<br>ACG AUU UUG UAC CAG AGU CCU UUG AUC GUG ACA AAA<br>CAA UUG CAC UGA UAA UGA AUU CCU CUG GAU <b>GGA GAG</b><br><b>AGA CCU ACU ACC UCA</b> ACC UUU UAU ACA ACC GUU CUA<br>CAC UCA ACG CGA UGU AAA UCU AUA GUG UCA CCU AAA<br>UGG G |
| Transcript with <b>complementary</b> target site to <i>Renilla reniformis</i> luciferase derived siRNA guide strand                                                     | GGG UCA CAU CUC AUC UAC CUC CCG GUU UUA AUG AAU<br>ACG AUU UUG UAC CAG AGU CCU UUG AUC GUG ACA AAA<br>CAA UUG CAC UGA UAA UGA AUU CCU CUG GAU <b>AAG GCA</b><br><b>UUU CAU UAU AGC UAU</b> ACC UUU UAU ACA ACC GUU CUA<br>CAC UCA ACG CGA UGU AAA UCU AUA GUG UCA CCU AAA<br>UGG G |
| Transcript with target site to <i>Renilla reniformis</i> luciferase derived siRNA guide strand with 1 nt mismatch at g4:t4                                              | GGG UCA CAU CUC AUC UAC CUC CCG GUU UUA AUG AAU<br>ACG AUU UUG UAC CAG AGU CCU UUG AUC GUG ACA AAA<br>CAA UUG CAC UGA UAA UGA AUU CCU CUG GAU <b>AAG GCA</b><br><b>UUU CAU UAU AGA UAU</b> ACC UUU UAU ACA ACC GUU CUA<br>CAC UCA ACG CGA UGU AAA UCU AUA GUG UCA CCU AAA<br>UGG G |

|                                                                                                                                             |                                                                                                                                                                                                                                                                                                            |
|---------------------------------------------------------------------------------------------------------------------------------------------|------------------------------------------------------------------------------------------------------------------------------------------------------------------------------------------------------------------------------------------------------------------------------------------------------------|
| <p>Transcript with target site to <i>Renilla reniformis</i> luciferase derived siRNA guide strand with 2 nt mismatches at g8g9:t8t9</p>     | <p>GGG UCA CAU CUC AUC UAC CUC CCG GUU UUA AUG AAU<br/> ACG AUU UUG UAC CAG AGU CCU UUG AUC GUG ACA AAA<br/> CAA UUG CAC UGA UAA UGA AUU CCU CUG GAU <b>AAG GCA</b><br/> <b>UUU CAU GCU AGC UAU</b> ACC UUU UAU ACA ACC GUU CUA<br/> CAC UCA <u>ACG</u> CGA UGU AAA UCU AUA GUG UCA CCU AAA<br/> UGG G</p> |
| <p>Transcript with target site to <i>Renilla reniformis</i> luciferase derived siRNA guide strand with 2 nt mismatches at g15g16:t15t16</p> | <p>GGG UCA CAU CUC AUC UAC CUC CCG GUU UUA AUG AAU<br/> ACG AUU UUG UAC CAG AGU CCU UUG AUC GUG ACA AAA<br/> CAA UUG CAC UGA UAA UGA AUU CCU CUG GAU <b>AAG GCC</b><br/> <b>GUU CAU UAU AGC UAU</b> ACC UUU UAU ACA ACC GUU CUA<br/> CAC UCA <u>ACG</u> CGA UGU AAA UCU AUA GUG UCA CCU AAA<br/> UGG G</p> |

**Table S3, Related to Figure 3.** Thermodynamic parameters from optical melts of RNA duplexes.  $T_M$  values are for  $1.0 \times 10^{-4}$  M total single-strand concentration.

| Guide:Target Duplex | $T_M^{-1}$ versus $\ln(C_T/4)$                             |                                         |                                                        |               | Average of Individual Fits                                 |                                         |                                                        |               | Nearest Neighbor Prediction                                |                                         |                                                        |               |
|---------------------|------------------------------------------------------------|-----------------------------------------|--------------------------------------------------------|---------------|------------------------------------------------------------|-----------------------------------------|--------------------------------------------------------|---------------|------------------------------------------------------------|-----------------------------------------|--------------------------------------------------------|---------------|
|                     | $\Delta G_{25^\circ\text{C}}$<br>(kcal mol <sup>-1</sup> ) | $\Delta H$<br>(kcal mol <sup>-1</sup> ) | $\Delta S$<br>(cal K <sup>-1</sup> mol <sup>-1</sup> ) | $T_M$<br>(°C) | $\Delta G_{25^\circ\text{C}}$<br>(kcal mol <sup>-1</sup> ) | $\Delta H$<br>(kcal mol <sup>-1</sup> ) | $\Delta S$<br>(cal K <sup>-1</sup> mol <sup>-1</sup> ) | $T_M$<br>(°C) | $\Delta G_{25^\circ\text{C}}$<br>(kcal mol <sup>-1</sup> ) | $\Delta H$<br>(kcal mol <sup>-1</sup> ) | $\Delta S$<br>(cal K <sup>-1</sup> mol <sup>-1</sup> ) | $T_M$<br>(°C) |
| <br>CUCCAUCp        | -8.7 ± 0.3                                                 | -50 ± 8                                 | -150 ± 30                                              | 39 ± 0        | -8.8 ± 0.3                                                 | -54 ± 6                                 | -150 ± 20                                              | 40 ± 1        | -8.5                                                       | -48                                     | -130                                                   | 39            |
| <br>CUCCAUCp        | -12 ± 1                                                    | -71 ± 7                                 | -200 ± 20                                              | 52 ± 0        | -12 ± 1                                                    | -62 ± 7                                 | -170 ± 20                                              | 53 ± 1        | -12                                                        | -66                                     | -180                                                   | 55            |
| <br>CUCCAUCAUp      | -9.8 ± 0                                                   | -73 ± 1                                 | -210 ± 0                                               | 40 ± 0        | -10 ± 0                                                    | -64 ± 0                                 | -180 ± 0                                               | 42 ± 0        | -8.3                                                       | -50                                     | -140                                                   | 37            |
| <br>CUCCAUCAUCp     | -15 ± 0                                                    | -100 ± 1                                | -300 ± 0                                               | 51 ± 0        | -14 ± 0                                                    | -99 ± 2                                 | -280 ± 10                                              | 51 ± 0        | -13                                                        | -77                                     | -220                                                   | 52            |
| <br>CUCCAUCAUp      | -14 ± 0                                                    | -82 ± 2                                 | -230 ± 10                                              | 56 ± 0        | -14 ± 0                                                    | -76 ± 1                                 | -210 ± 0                                               | 57 ± 0        | -13                                                        | -69                                     | -190                                                   | 58            |
| <br>CUCCAUCAUp      | -18 ± 0                                                    | -106 ± 3                                | -290 ± 10                                              | 61 ± 0        | -17 ± 0                                                    | -93 ± 1                                 | -260 ± 0                                               | 62 ± 0        | -16                                                        | -84                                     | -230                                                   | 64            |

**Table S4, Related to Figure 5 and Figure 7.** Equilibrium competition parameters for fly Ago2-RISC and mouse AGO2-RISC (mean  $\pm$  S.D.;  $n = 3$ ).

| <b><i>let-7</i>-programmed, affinity-purified <i>Drosophila melanogaster</i> Ago2-RISC</b> |                              |                             |                                          |
|--------------------------------------------------------------------------------------------|------------------------------|-----------------------------|------------------------------------------|
| <b>Target</b>                                                                              | <b><math>K_C</math> (pM)</b> | <b><math>K_{rel}</math></b> | <b><math>K_{D(adjusted)}</math> (pM)</b> |
| 28 nt complete complementarity                                                             | $10 \pm 1$                   | $1.0 \pm 0.2$               | $4.0 \pm 1.0$                            |
| 21 nt complete complementarity                                                             | $9.0 \pm 0$                  | $1.0 \pm 0.1$               | $4.0 \pm 1.0$                            |
| 28 nt unmodified g9–g11 central internal loop                                              | $9.0 \pm 2.0$                | $1.0 \pm 0.2$               | $3.0 \pm 1.0$                            |
| g2–g21 complementary                                                                       | $8.7 \pm 0.8$                | $1.0 \pm 0.1$               | $4.0 \pm 1.0$                            |
| g4g5 mismatches in seed                                                                    | $(5.6 \pm 0.8) \times 10^3$  | $600 \pm 100$               | $(2.3 \pm 0.7) \times 10^3$              |
| g8g9 central internal loop                                                                 | $13 \pm 1$                   | $1.3 \pm 0.2$               | $5.0 \pm 2.0$                            |
| g10g11 central internal loop                                                               | $7.6 \pm 0.4$                | $1.0 \pm 0.1$               | $3.1 \pm 0.9$                            |
| g15g16 mismatches in 3' supplementary region                                               | $(2.4 \pm 0.3) \times 10^3$  | $250 \pm 40$                | $(1.0 \pm 0.3) \times 10^3$              |
| g2–g16 complementary                                                                       | $(1.1 \pm 0.1) \times 10^2$  | $11 \pm 2$                  | $40 \pm 10$                              |
| g9–g21 complementary                                                                       | $(2.3 \pm 0.2) \times 10^3$  | $240 \pm 40$                | $(1.0 \pm 0.3) \times 10^3$              |
| Seed only (g2–g8)                                                                          | $(7.3 \pm 0.9) \times 10^2$  | $100 \pm 10$                | $(3.0 \pm 0.9) \times 10^2$              |



|                                                                                 |                              |                             |                                          |
|---------------------------------------------------------------------------------|------------------------------|-----------------------------|------------------------------------------|
| Seed plus<br>g13–g16 3' supplementary                                           | $(4.1 \pm 0.4) \times 10^2$  | $43 \pm 7$                  | $(1.7 \pm 0.5) \times 10^2$              |
| Extended seed (g2–g10)                                                          | $(5.1 \pm 0.6) \times 10^2$  | $53 \pm 9$                  | $(2.1 \pm 0.6) \times 10^2$              |
| Seed plus extended<br>g12–g17 3' supplementary                                  | $19 \pm 1$                   | $2.0 \pm 0.2$               | $8.0 \pm 2.0$                            |
| 6 nt seed (g2–g7)                                                               | $(1.6 \pm 0.2) \times 10^3$  | $170 \pm 30$                | $(7 \pm 2) \times 10^2$                  |
| Non-complementary<br>luciferase target                                          | $(1.5 \pm 0.1) \times 10^4$  | $1600 \pm 200$              | $(6.0 \pm 2.0) \times 10^3$              |
| 1 GU wobble (g4) in seed                                                        | $(2.9 \pm 0.8) \times 10^2$  | $30 \pm 9$                  | $(1.2 \pm 0.5) \times 10^2$              |
| 1 GU wobble (g15)<br>in 3' supplementary region                                 | $60 \pm 5$                   | $6.3 \pm 0.9$               | $24 \pm 7$                               |
| 2 GU wobbles<br>(g2, g8) in seed                                                | $(3.8 \pm 0.3) \times 10^2$  | $40 \pm 5$                  | $(1.5 \pm 0.5) \times 10^2$              |
| 2 GU wobbles<br>(g4, g5) in seed                                                | $(3.5 \pm 0.5) \times 10^3$  | $370 \pm 70$                | $(1.4 \pm 0.5) \times 10^3$              |
| 4 GU wobbles<br>(g2, g4, g5, g8) in seed                                        | $(4.5 \pm 0.1) \times 10^3$  | $470 \pm 60$                | $(1.8 \pm 0.5) \times 10^3$              |
| <b><i>let-7</i>-programmed, affinity-purified <i>Mus musculus</i> AGO2-RISC</b> |                              |                             |                                          |
| <b>Target</b>                                                                   | <b><math>K_c</math> (pM)</b> | <b><math>K_{rel}</math></b> | <b><math>K_{D(adjusted)}</math> (pM)</b> |
| 28 nt complete<br>complementarity                                               | $36 \pm 5$                   | $1.0 \pm 0.2$               | $20 \pm 10$                              |
| g10g11 central internal loop                                                    | $80 \pm 30$                  | $2.2 \pm 0.8$               | $50 \pm 30$                              |

|                                                 |                             |               |                             |
|-------------------------------------------------|-----------------------------|---------------|-----------------------------|
| g15g16 mismatches<br>in 3' supplementary region | $50 \pm 20$                 | $1.4 \pm 0.6$ | $30 \pm 20$                 |
| g1–g19 complementary                            | $70 \pm 10$                 | $2.0 \pm 0.4$ | $40 \pm 20$                 |
| Seed only (g2–g8)                               | $50 \pm 10$                 | $1.5 \pm 0.3$ | $30 \pm 20$                 |
| Seed plus<br>g13–g16 3' supplementary           | $34 \pm 5$                  | $1.0 \pm 0.2$ | $20 \pm 10$                 |
| g4g5 mismatches in seed                         | $(1.3 \pm 0.7) \times 10^3$ | $40 \pm 20$   | $(1.0 \pm 0.6) \times 10^3$ |
| Non-complementary<br>luciferase target          | $(3.2 \pm 0.8) \times 10^3$ | $100 \pm 30$  | $(2.0 \pm 1.0) \times 10^3$ |
